# Supplementary material for: Model-Based Characterization of Inflammatory Gene Expression Patterns of Activated Macrophages
Source: PubMed Central journal article supplement (PMC4963125; doi:10.1371/journal.pcbi.1005018), 2016-07-27
Supplement: pcbi.1005018.s006.pdf [file pcbi.1005018.s006.pdf]

| No | node               | official full name / description                                                       | NCBI Gene ID          | new |
|----|--------------------|----------------------------------------------------------------------------------------|-----------------------|-----|
| 1  | Akt1               | thymoma viral proto-oncogene 1                                                         | 11651                 |     |
| 2  | Akt2               | thymoma viral proto-oncogene 2                                                         | 11652                 |     |
| 3  | AP1                | transcription factor consisting of cJun and ATF-2                                      | -                     |     |
| 4  | Arg1               | arginase, liver                                                                        | 11846                 |     |
| 5  | Arg1mRNA           | mRNA encoding Arg1                                                                     | -                     |     |
| 6  | ATF2               | activating transcription factor 2                                                      | 11909                 |     |
| 7  | CBP                | CREB binding protein                                                                   | 12914                 |     |
| 8  | Ccl2/3/4/5/6/7     | chemokine (C-C motif) ligand 2/3/4/5/7 induced by NF- $\kappa$ B                       | 20296, 20302-4, 20306 | #1  |
| 9  | Ccl2/3/4/5/6/7mRNA | mRNA encoding Ccl2/3/4/5/7 (NF- $\kappa$ B target)                                     | -                     | #2  |
| 10 | Ccl2/7mRNA_Stat6   | mRNA encoding Ccl2/7 (Stat6 target)                                                    | -                     | #3  |
| 11 | Ccl2/7_Stat6       | chemokine (C-C motif) ligand 2/7 induced by Stat6                                      | 20296, 20306          | #4  |
| 12 | Ccl5mRNA_Stat1     | mRNA encoding Ccl5 (Stat1 target)                                                      | x                     |     |
| 13 | Ccl5_Stat1         | chemokine (C-C motif) ligand 5 induced by Stat1                                        | 20304                 |     |
| 14 | CD14               | CD14 antigen                                                                           | 12475                 |     |
| 15 | CEBPb              | CCAAT/enhancer binding protein (C/EBP), beta                                           | 12608                 |     |
| 16 | cJun               | jun proto-oncogene                                                                     | 16476                 |     |
| 17 | coSignal           | coregulating signal induced by LPS                                                     | -                     |     |
| 18 | CREB               | cAMP responsive element binding protein 1                                              | 12912                 |     |
| 19 | Cxcl1/2/3          | chemokine (C-X-C motif) ligand 1/2/3                                                   | 14825, 20310, 330122  | #5  |
| 20 | Cxcl1/2/3mRNA      | mRNA encoding Cxcl1/2/3                                                                | -                     | #6  |
| 21 | dum_DUSP1_inh      | inhibitory dummy species to decouple activating from inhibitory signals at $\tau = 15$ | -                     |     |
| 22 | dum_IkBa_inh       | inhibitory dummy species to decouple activating from inhibitory signals at $\tau = 15$ | -                     |     |
| 23 | dum_Socs1_inh      | inhibitory dummy species to decouple activating from inhibitory signals at $\tau = 15$ | -                     |     |
| 24 | dum_Socs3_inh      | inhibitory dummy species to decouple activating from inhibitory signals at $\tau = 15$ | -                     |     |
| 25 | DUSP1mRNA_NFkB     | mRNA encoding DUSP1 (NF- $\kappa$ B target)                                            | -                     |     |
| 26 | DUSP1mRNA_Stat3    | mRNA encoding DUSP1 (Stat3 target)                                                     | -                     |     |
| 27 | DUSP1_NFkB         | dual specificity phosphatase 1 (NF- $\kappa$ B target)                                 | 19252                 |     |
| 28 | DUSP1_Stat3        | dual specificity phosphatase 1 (Stat3 target)                                          | 19252                 |     |
| 29 | ERK                | mitogen-activated protein kinase 1                                                     | 26413                 |     |
| 30 | Fes                | feline sarcoma oncogene                                                                | 14159                 |     |
| 31 | hk                 | housekeeping dummy species activating constantly expressed proteins at $\tau = 0$      | -                     |     |
| 32 | hk_inh             | housekeeping inhibitory dummy species maintaining inhibitory species at $\tau = 15$    | -                     |     |

| No | node           | official full name / description                                                                     | NCBI Gene ID  | new |
|----|----------------|------------------------------------------------------------------------------------------------------|---------------|-----|
| 33 | hk_medium      | housekeeping dummy species maintaining secreted proteins                                             | -             |     |
| 34 | IFNAR          | interferon (alpha and beta) receptor 1                                                               | 15975         |     |
| 35 | IFNbmRNA       | mRNA encoding IFN $\beta$                                                                            | -             |     |
| 36 | IFNb_medium    | interferon beta 1 (secreted)                                                                         | 15977         |     |
| 37 | IFNb_syn       | interferon beta 1 (newly synthesized)                                                                | 15977         |     |
| 38 | IkBa           | nuclear factor of kappa light polypeptide gene enhancer in B cells inhibitor, alpha                  | 18035         |     |
| 39 | IkBamRNA       | mRNA encoding I $\kappa$ B $\alpha$                                                                  | -             |     |
| 40 | IkBa_syn       | I $\kappa$ B $\alpha$ (newly synthesized)                                                            | 15977         |     |
| 41 | IKK            | inhibitor of kappa B kinase                                                                          | -             |     |
| 42 | IL10mRNA_Stat3 | mRNA encoding IL-10 (Stat3 target)                                                                   | -             | #7  |
| 43 | IL10mRNA_MK2   | mRNA encoding IL-10 (induced by MK2)                                                                 | -             | *   |
| 44 | IL10R          | interleukin 10 receptor consisting of alpha and beta subunit                                         | 16154/5       |     |
| 45 | IL10_medium    | interleukin 10 (secreted)                                                                            | 16153         |     |
| 46 | IL10_syn_MK2   | interleukin 10 (newly synthesized, induced by MK2)                                                   | 16153         | *   |
| 47 | IL10_syn_Stat3 | interleukin 10 (newly synthesized, Stat3 target)                                                     | 16153         | #8  |
| 48 | IL13           | interleukin 13                                                                                       | 16163         |     |
| 49 | IL13Ra2        | interleukin 13 receptor, alpha 2                                                                     | 16165         |     |
| 50 | IL1bmRNA       | mRNA encoding IL-1 $\beta$                                                                           | -             |     |
| 51 | IL1b_syn       | interleukin 1 beta (newly synthesized)                                                               | 16176         |     |
| 52 | IL1rnmRNA_NFkB | mRNA encoding IL1rn (NF- $\kappa$ B target)                                                          | -             | #9  |
| 53 | IL1rnmRNA_Stat | mRNA encoding IL1rn (Stat target)                                                                    | -             | *   |
| 54 | IL1rn_NFkB     | interleukin 1 receptor antagonist (NF- $\kappa$ B target)                                            | 16181         | #10 |
| 55 | IL1rn_Stat     | interleukin 1 receptor antagonist (Stat target)                                                      | 16181         | *   |
| 56 | IL4            | interleukin 4                                                                                        | 16189         |     |
| 57 | IL4Ra/IL13Ra1  | receptor complex consisting of interleukin 4 receptor, alpha and interleukin 13 receptor, alpha 1    | 16190, 16164  |     |
| 58 | IL4Ra/IL2Ry    | receptor complex consisting of interleukin 4 receptor, alpha and interleukin 2 receptor, gamma chain | 16190, 16186  |     |
| 59 | IL6mRNA        | mRNA encoding IL-6                                                                                   | -             |     |
| 60 | IL6_syn        | interleukin 6 (newly synthesized)                                                                    | 16193         |     |
| 61 | IRAK1          | interleukin-1 receptor-associated kinase 1                                                           | 16179         |     |
| 62 | IRAK2c         | interleukin-1 receptor-associated kinase 2                                                           | 108960        |     |
| 63 | IRAK2d         | interleukin-1 receptor-associated kinase 2                                                           | 108960        |     |
| 64 | IRAK4          | interleukin-1 receptor-associated kinase 4                                                           | 266632        |     |
| 65 | IRAKM          | interleukin-1 receptor-associated kinase 3                                                           | 73914         |     |
| 66 | IRF3           | interferon regulatory factor 3                                                                       | 54131         |     |
| 67 | IRS1/2         | insulin receptor substrate 1/2                                                                       | 16367, 384783 |     |
| 68 | Jak1           | Janus kinase 1                                                                                       | 16451         |     |
| 69 | Jak2           | Janus kinase 2                                                                                       | 16452         |     |

| No  | node       | official full name / description                                                    | NCBI Gene ID | new |
|-----|------------|-------------------------------------------------------------------------------------|--------------|-----|
| 70  | Jak3       | Janus kinase 3                                                                      | 16453        |     |
| 71  | JNK        | mitogen-activated protein kinase 8/9                                                | 26419/20     |     |
| 72  | LBP        | lipopolysaccharide binding protein                                                  | 16803        |     |
| 73  | LPS        | lipopolysaccharide                                                                  | -            |     |
| 74  | Mal        | myelin and lymphocyte protein, T cell differentiation protein                       | 17153        |     |
| 75  | MD2        | lymphocyte antigen 96                                                               | 17087        |     |
| 76  | miR155     | microRNA 155                                                                        | 387173       |     |
| 77  | MK2        | MAP kinase-activated protein kinase 2                                               | 17164        |     |
| 78  | MK3        | MAP kinase-activated protein kinase 3                                               | 102626       |     |
| 79  | MKK1/2     | mitogen-activated protein kinase kinase 1/2                                         | 26395/6      |     |
| 80  | MKK3       | mitogen-activated protein kinase kinase 3                                           | 26397        |     |
| 81  | MKK4       | mitogen-activated protein kinase kinase 4                                           | 26398        |     |
| 82  | MKK6       | mitogen-activated protein kinase kinase 6                                           | 26399        |     |
| 83  | MKK7       | mitogen-activated protein kinase kinase 7                                           | 26400        |     |
| 84  | Mrc1       | mannose receptor, C type 1                                                          | 17533        |     |
| 85  | Mrc1mRNA   | mRNA encoding Mrc1                                                                  | -            |     |
| 86  | MSK1       | mitogen- and stress-activated kinase 1                                              | -            |     |
| 87  | MSK2       | mitogen- and stress-activated kinase 2                                              | -            |     |
| 88  | MyD88      | myeloid differentiation primary response gene 88                                    | 17874        |     |
| 89  | MyD88s     | myeloid differentiation primary response gene 88 short (alternative splice variant) | 17874        |     |
| 90  | NFkB       | nuclear factor of kappa light polypeptide gene enhancer in B cells                  | -            |     |
| 91  | p300       | E1A binding protein p300                                                            | 328572       |     |
| 92  | p38        | mitogen-activated protein kinase 14                                                 | 26416        |     |
| 93  | p70S6K     | ribosomal protein S6 kinase                                                         | 72508        |     |
| 94  | p90Rsk_il  | ribosomal protein S6 kinase                                                         | 20111        |     |
| 95  | p90Rsk_lps | ribosomal protein S6 kinase                                                         | 20111        |     |
| 96  | PDK1       | pyruvate dehydrogenase kinase, isoenzyme 1                                          | 228026       |     |
| 97  | PI3K       | phosphatidylinositol 3-kinase                                                       | -            |     |
| 98  | PIP3       | phosphatidylinositol 3 phosphat                                                     | -            |     |
| 99  | PKC        | protein kinase C                                                                    | -            |     |
| 100 | PP2A       | protein phosphatase 2                                                               | -            |     |
| 101 | PTEN       | phosphatase and tensin homolog                                                      | 19211        |     |
| 102 | RIP1       | receptor (TNFRSF)-interacting serine-threonine kinase 1                             | 19766        |     |
| 103 | RIP3       | receptor (TNFRSF)-interacting serine-threonine kinase 3                             | 56532        |     |
| 104 | SHP1       | protein tyrosine phosphatase, non-receptor type 6                                   | 15170        |     |
| 105 | SIGIRR     | single immunoglobulin and toll-interleukin 1 receptor (TIR) domain                  | 24058        |     |
| 106 | Socs1      | suppressor of cytokine signaling 1                                                  | 12703        |     |
| 107 | Socs1mRNA  | mRNA encoding Socs1                                                                 | -            |     |

| No  | node            | official full name / description                                 | NCBI Gene ID | new |
|-----|-----------------|------------------------------------------------------------------|--------------|-----|
| 108 | Socs2           | suppressor of cytokine signaling 2                               | 216233       |     |
| 109 | Socs2mRNA       | mRNA encoding Socs2                                              | -            |     |
| 110 | Socs3mRNA_MK2   | mRNA encoding Socs3 (induced by MK2)                             | -            | *   |
| 111 | Socs3mRNA_Stat3 | mRNA encoding Socs3 (Stat3 target)                               | -            | #11 |
| 112 | Socs3_MK2       | suppressor of cytokine signaling 3<br>(induced by MK2)           | 12702        | *   |
| 113 | Socs3_Stat3     | suppressor of cytokine signaling 3<br>(Stat3 target)             | 12702        | #12 |
| 114 | Src             | Rous sarcoma oncogene                                            | 20779        |     |
| 115 | ST2             | interleukin 1 receptor-like 1                                    | 17082        |     |
| 116 | Stat1           | signal transducer and activator of tran-<br>scription 1          | 20846        |     |
| 117 | Stat3           | signal transducer and activator of tran-<br>scription 3          | 20848        |     |
| 118 | Stat6           | signal transducer and activator of tran-<br>scription 6          | 20852        |     |
| 119 | TAB             | TGF $\beta$ activated kinase 1/MAP3K7 bind-<br>ing protein       | 68652, 66724 |     |
| 120 | TAK1            | TGF $\beta$ activated kinase 1/MAP3K7                            | 26409        |     |
| 121 | TBK1            | TANK-binding kinase 1                                            | 56480        |     |
| 122 | TLR4            | toll-like receptor 4                                             | 21898        |     |
| 123 | TLR4RC          | TLR4 receptor complex consisting of TLR4,<br>CD14, LPS, LBP, MD2 | -            |     |
| 124 | TNFamRNA        | mRNA encoding TNF $\alpha$                                       | -            |     |
| 125 | TNFa_syn        | tumor necrosis factor                                            | 21926        |     |
| 126 | TPL2            | mitogen-activated protein kinase kinase ki-<br>nase 8            | 26410        |     |
| 127 | TRAF6           | TNF receptor-associated factor 6                                 | 22034        |     |
| 128 | TRAM            | toll-like receptor adaptor molecule 2                            | 225471       |     |
| 129 | TRIAD3A         | an E3 ubiquitin-protein ligase regulating<br>Toll-like receptors | -            |     |
| 130 | TRIF            | toll-like receptor adaptor molecule 1                            | 106759       |     |
| 131 | TTP             | tristetraprolin/zinc finger protein 36                           | 22695        |     |
| 132 | Tyk2            | tyrosine kinase 2                                                | 54721        |     |
