# Supplementary material for: Model-Based Characterization of Inflammatory Gene Expression Patterns of Activated Macrophages
Source: PubMed Central journal article supplement (PMC4963125; doi:10.1371/journal.pcbi.1005018), 2016-07-27
Supplement: pcbi.1005018.s007.pdf [file pcbi.1005018.s007.pdf]

| No | node            | official full name / description                                             | NCBI Gene ID                | mod |
|----|-----------------|------------------------------------------------------------------------------|-----------------------------|-----|
| 1  | Ccl2/3/4/5      | chemokine (C-C motif) ligand 2/3/4/5 induced by NF- $\kappa$ B               | 20296, 20302-4              | #1  |
| 2  | Ccl2/3/4/5mRNA  | mRNA encoding Ccl2/3/4/5 (NF- $\kappa$ B target)                             | -                           | #2  |
| 3  | Ccl2mRNA_Stat6  | mRNA encoding Ccl2 (Stat6 target)                                            | -                           | #3  |
| 4  | Ccl2_Stat6      | chemokine (C-C motif) ligand 2 induced by Stat6                              | 20296                       | #4  |
| 5  | Cxcl1/2/3/5     | chemokine (C-X-C motif) ligand 1/2/3/5                                       | 14825, 20310, 330122, 20311 | #5  |
| 6  | Cxcl1/2/3/5mRNA | mRNA encoding Cxcl1/2/3/5                                                    | -                           | #6  |
| 7  | gp130           | interleukin 6 signal transducer                                              | 16195                       |     |
| 8  | gp80            | interleukin 6 receptor, alpha                                                | 16194                       |     |
| 9  | IFNamRNA        | mRNA encoding IFN $\alpha$                                                   | -                           |     |
| 10 | IFNa_medium     | interferon alpha 1 (secreted)                                                | 15962                       |     |
| 11 | IFNa_syn        | interferon alpha 1 (newly synthesized)                                       | 15962                       |     |
| 12 | IFNgmRNA        | mRNA encoding IFN $\gamma$                                                   | -                           |     |
| 13 | IFNGR           | interferon gamma receptor 1                                                  | 15979                       |     |
| 14 | IFNg_medium     | interferon gamma (secreted)                                                  | 15978                       |     |
| 15 | IFNg_syn        | interferon gamma (newly synthesized)                                         | 15978                       |     |
| 16 | IL10mRNA        | mRNA encoding IL-10                                                          | -                           | #7  |
| 17 | IL10_syn        | interleukin 10 (newly synthesized)                                           | 16153                       | #8  |
| 18 | IL1bRC          | IL-1 $\beta$ receptor complex consisting of IL-1 $\beta$ , IL1R1 and IL1RAcP | -                           |     |
| 19 | IL1b_medium     | interleukin 1 beta (secreted)                                                | 16176                       |     |
| 20 | IL1R1           | interleukin 1 receptor, type I                                               | 16177                       |     |
| 21 | IL1RAcP         | interleukin 1 receptor accessory protein                                     | 16180                       |     |
| 22 | IL1rnmRNA       | mRNA encoding IL1rn                                                          | -                           | #9  |
| 23 | IL1rn           | interleukin 1 receptor antagonist                                            | 16181                       | #10 |
| 24 | IL6RC           | IL-6 receptor complex consisting of IL-6, gp80 and gp130                     | -                           |     |
| 25 | IL6_medium      | interleukin 6 (secreted)                                                     | 16193                       |     |
| 26 | OSM             | oncostatin M                                                                 | 18413                       |     |
| 27 | OSMmRNA         | mRNA encoding OSM                                                            | -                           |     |
| 28 | Socs3mRNA       | mRNA encoding Socs3                                                          | -                           | #11 |
| 29 | Socs3           | suppressor of cytokine signaling 3                                           | 12702                       | #12 |
| 30 | TNFaRC1         | TNF receptor complex 1 consisting of TNF, TNFR1, TRADD, Rip1 and TRAF2       | -                           |     |
| 31 | TNFa_medium     | tumor necrosis factor (secreted)                                             | 21926                       |     |
| 32 | TNFR1           | tumor necrosis factor receptor superfamily, member 1                         | 21937/8                     |     |
| 33 | TRADD           | TNFRSF1A-associated via death domain                                         | 71609                       |     |
| 34 | TRAF2           | TNF receptor-associated factor 2                                             | 22030                       |     |
