# Supplementary material for: Model-Based Characterization of Inflammatory Gene Expression Patterns of Activated Macrophages
Source: PubMed Central journal article supplement (PMC4963125; doi:10.1371/journal.pcbi.1005018), 2016-07-27
Supplement: pcbi.1005018.s009.pdf [file pcbi.1005018.s009.pdf]

| No | equation                                             | $\tau$ | description                | reference   | mod |
|----|------------------------------------------------------|--------|----------------------------|-------------|-----|
| 1  | hk = IL1R1                                           | 0      | IL-1 $\beta$ signaling     | -           |     |
| 2  | hk = IL1RAcP                                         | 0      | IL-1 $\beta$ signaling     | -           |     |
| 3  | hk = TNFR1                                           | 0      | TNF $\alpha$ signaling     | -           |     |
| 4  | hk = TRADD                                           | 0      | TNF $\alpha$ signaling     | -           |     |
| 5  | hk = TRAF2                                           | 0      | TNF $\alpha$ signaling     | -           |     |
| 6  | hk = gp80                                            | 0      | IL-6 signaling             | -           |     |
| 7  | hk = gp130                                           | 0      | IL-6 signaling             | -           |     |
| 8  | IL1b_medium + IL1R1 + IL1RAcP = IL1bRC               | 1      | IL-1 $\beta$ signaling     | [1]         |     |
| 9  | MyD88 + !MyD88s + IL1bRC = IRAK4                     | 1      | IL-1 $\beta$ signaling     | [1]         |     |
| 10 | TNFa_medium + RIP1 + TNFR1 + TRADD + TRAF2 = TNFaRC1 | 1      | TNF $\alpha$ signaling     | [1]         |     |
| 11 | TNFaRC1 = TAK1                                       | 1      | TNF $\alpha$ signaling     | [1]         |     |
| 12 | IL6_medium + gp80 + gp130 = IL6RC                    | 1      | IL-6 signaling             | [2]         |     |
| 13 | IL6RC + Jak1 + !dum_Socs3_inh = Stat3                | 1      | IL-6 signaling             | [2, 3]      |     |
| 14 | IFNg_medium = IFNGR                                  | 1      | IFN $\gamma$ signaling     | [2, 3]      |     |
| 15 | IFNGR + Jak1 + !dum_Socs1_inh = Stat1                | 1      | IFN $\gamma$ signaling     | [4]         |     |
| 16 | IFNGR + Jak2 + !dum_Socs1_inh = Stat1                | 1      | IFN $\gamma$ signaling     | [4]         |     |
| 17 | IFNa_medium = IFNAR                                  | 1      | IFN $\alpha$ signaling     | [4]         |     |
| 18 | NFkB + IRF3 + p300 + CBP = IFNgmRNA                  | 5      | TLR4 signaling             | [5]         |     |
| 19 | NFkB + IRF3 + p300 + CBP = IFNamRNA                  | 5      | TLR4 signaling             | [6]         |     |
| 20 | NFkB + MSK1 = IL1rnmRNA                              | 5      | TLR4 signaling             | [7, 8]      | #1  |
| 21 | NFkB = OSMmRNA                                       | 5      | TLR4 signaling             | [7, 9]      |     |
| 22 | NFkB = Ccl2/3/4/5mRNA                                | 5      | TLR4 signaling             | [10]        | #2  |
| 23 | NFkB = Cxcl1/2/3/5mRNA                               | 5      | TLR4 signaling             | [10]        | #3  |
| 24 | Stat6 = Ccl2mRNA                                     | 5      | IL-4/13 signaling          | [10]        | #4  |
| 25 | Stat3 + Src = Socs3mRNA                              | 5      | IFN/IL-10 signaling        | [7, 11, 12] | #5  |
| 26 | IFNgmRNA = IFNg_syn                                  | 7      | TLR4 signaling             | [5]         |     |
| 27 | IFNamRNA = IFNa_syn                                  | 7      | TLR4 signaling             | [6]         |     |
| 28 | IL1rnmRNA = IL1rn                                    | 7      | TLR4 signaling             | [7, 8]      | #6  |
| 29 | OSMmRNA = OSM                                        | 7      | TLR4 signaling             | [7, 9]      |     |
| 30 | Ccl2/3/4/5mRNA = Ccl2/3/4/5                          | 7      | TLR4 signaling             | [10]        | #7  |
| 31 | Cxcl1/2/3/5mRNA = Cxcl1/2/3/5                        | 7      | TLR4 signaling             | [10]        | #8  |
| 32 | Ccl2mRNA_Stat6 = Ccl2_Stat6                          | 7      | IL-4/13 signaling          | [10]        | #9  |
| 33 | IL10mRNA + !TTP = IL10_syn                           | 7      | IFN/IL-10 signaling        | [7]         | #10 |
| 34 | Socs3mRNA = Socs3                                    | 7      | IFN/IL-10 signaling        | [13]        | #11 |
| 35 | IL1b_syn = IL1b_medium                               | 10     | protein secretion          | [7, 14]     |     |
| 36 | TNFa_syn = TNFa_medium                               | 10     | protein secretion          | [7, 14]     |     |
| 37 | IL6_syn = IL6_medium                                 | 10     | protein secretion          | [7]         |     |
| 38 | IFNg_syn = IFNg_medium                               | 10     | protein secretion          | [5]         |     |
| 39 | IFNa_syn = IFNa_medium                               | 10     | protein secretion          | [6]         |     |
| 40 | IL10_syn = IL10_medium                               | 12     | protein secretion          | [7]         | #12 |
| 41 | hk_medium + LPS = IL1b_medium                        | 15     | maintain secreted proteins | -           |     |
| 42 | hk_medium + LPS = TNFa_medium                        | 15     | maintain secreted proteins | -           |     |
| 43 | hk_medium + LPS = IL6_medium                         | 15     | maintain secreted proteins | -           |     |
| 44 | hk_medium + LPS = IFNg_medium                        | 15     | maintain secreted proteins | -           |     |

| No | equation                      | $\tau$ | description                                | reference | mod |
|----|-------------------------------|--------|--------------------------------------------|-----------|-----|
| 45 | hk_medium + LPS = IFNa_medium | 15     | maintain secreted proteins                 | -         |     |
| 46 | Socs3 = dum_Socs3_inh         | 15     | activation of the inhibitory dummy species | -         | #13 |

## References

- [1] Verstrepen L, Bekaert T, Chau TL, Tavernier J, Chariot A, Beyaert R. TLR-4, IL-1R and TNF-R signaling to NF-kappaB: variations on a common theme. *Cellular and molecular life sciences : CMLS*. 2008 oct;65(19):2964–78.
- [2] Aaronson DS, Horvath CM. A road map for those who don't know JAK-STAT. *Science (New York, NY)*. 2002 may;296(5573):1653–1655.
- [3] Heinrich PC, Behrmann I, Haan S, Hermanns HM, Müller-Newen G, Schaper F. Principles of interleukin (IL)-6-type cytokine signalling and its regulation. *The Biochemical journal*. 2003 aug;374(Pt 1):1–20.
- [4] Plataniias LC. Mechanisms of type-I- and type-II-interferon-mediated signalling. *Nature reviews Immunology*. 2005 may;5(5):375–386.
- [5] Fultz MJ, Barber Sa, Dieffenbach CW, Vogel SN. Induction of IFN-gamma in macrophages by lipopolysaccharide. *International immunology*. 1993 nov;5(11):1383–1392.
- [6] Fitzgerald Ka, Rowe DC, Barnes BJ, Caffrey DR, Visintin A, Latz E, et al. LPS-TLR4 signaling to IRF-3/7 and NF-kappaB involves the toll adapters TRAM and TRIF. *The Journal of experimental medicine*. 2003;198(7):1043–1055.
- [7] Bode JG, Ehltling C, Häussinger D. The macrophage response towards LPS and its control through the p38 MAPK-STAT3 axis. *Cellular Signalling*. 2012;24(6):1185–1194.
- [8] Darragh J, Ananieva O, Courtney A, Elcombe S, Arthur JSC. MSK1 regulates the transcription of IL-1ra in response to TLR activation in macrophages. *The Biochemical journal*. 2010;425:595–602.
- [9] Wallace PM, MacMaster JF, Rouleau Ka, Brown TJ, Loy JK, Donaldson KL, et al. Regulation of inflammatory responses by oncostatin M. *Journal of immunology (Baltimore, Md : 1950)*. 1999;162:5547–5555.
- [10] Mantovani A, Sica A, Sozzani S, Allavena P, Vecchi A, Locati M. The chemokine system in diverse forms of macrophage activation and polarization. *Trends in Immunology*. 2004;25(12):677–686.
- [11] Murray PJ, Allen JE, Biswas SK, Fisher Ea, Gilroy DW, Goerdts S, et al. Macrophage Activation and Polarization: Nomenclature and Experimental Guidelines. *Immunity*. 2014;41(1):14–20.
- [12] Sabat R, Grütz G, Warszawska K, Kirsch S, Witte E, Wolk K, et al. Biology of interleukin-10. *Cytokine and Growth Factor Reviews*. 2010;21:331–344.
- [13] Wilson HM. SOCS proteins in macrophage polarization and function. *Frontiers in Immunology*. 2014;5(July):1–5.
- [14] Ulich TR, Watson LR, Yin SM, Guo KZ, Wang P, Thang H, et al. The intratracheal administration of endotoxin and cytokines. I. Characterization of LPS-induced IL-1 and TNF mRNA expression and the LPS-, IL-1-, and TNF-induced inflammatory infiltrate. *The American journal of pathology*. 1991;138(6):1485–1496.
